# Supplementary material for: Microbiome-derived antimicrobial peptides offer therapeutic solutions for the treatment of Pseudomonas aeruginosa infections
Source: PubMed Central journal article supplement (PMC9424236; doi:10.1038/s41522-022-00332-w), 2022-08-29
Supplement: 41522_2022_332_MOESM1_ESM.pdf [file 41522_2022_332_MOESM1_ESM.pdf]

## Electronic Supplementary Material

# **Microbiome-derived antimicrobial peptides offer therapeutic solutions for the treatment of *Pseudomonas aeruginosa* infections**

Adam J. Mulkern, Linda B. Oyama, Alan R. Cookson, Christopher J. Creevey, Toby J. Wilkinson, Hamza Olleik, Marc Maresca, Giarla C. da Silva, Patricia P. Fontes, Denise M. S. Bazzolli, Hilario C Mantovani, Bamu F. Damaris, Luis A. J. Mur, Sharon A. Huws

Corresponding authors: Dr Adam Mulkern ([mulkern.adam@mh-hannover.de](mailto:mulkern.adam@mh-hannover.de)) & Dr Sharon A Huws ([s.huws@qub.ac.uk](mailto:s.huws@qub.ac.uk))

### This PDF file includes:

Supplementary Figures 1 to 7

Supplementary Table 1

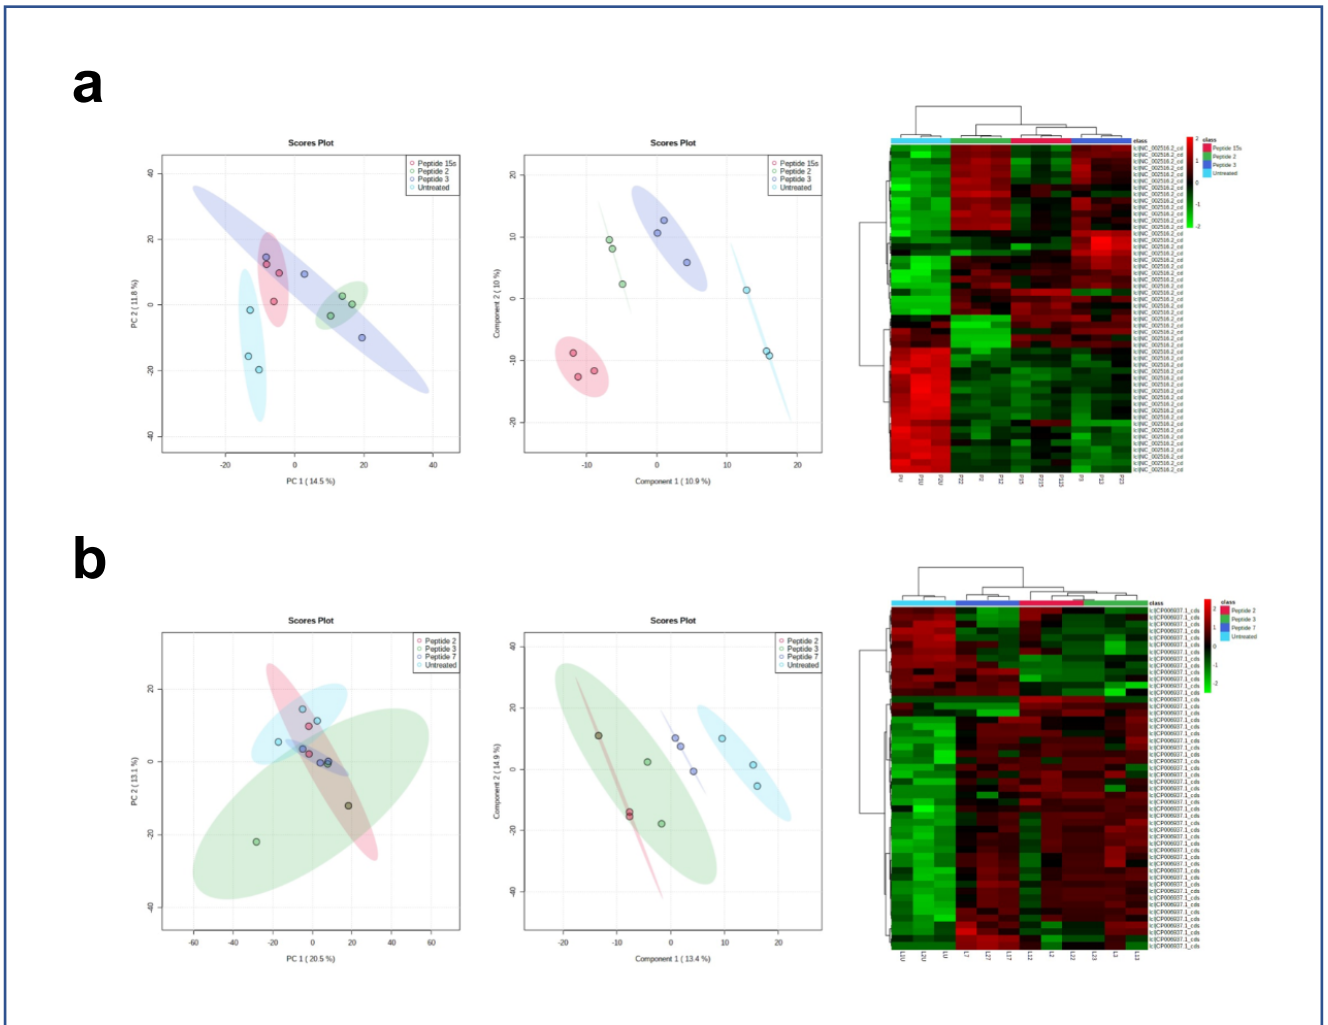

**Supplementary Figure 1. Transcriptomic assessment of mode of action: Raw Kallisto counts log-transformed for [a] PAO1 and [b] LES431 in the form of PCA, PLS-DA and top 50 HCA heatmap respectively.**

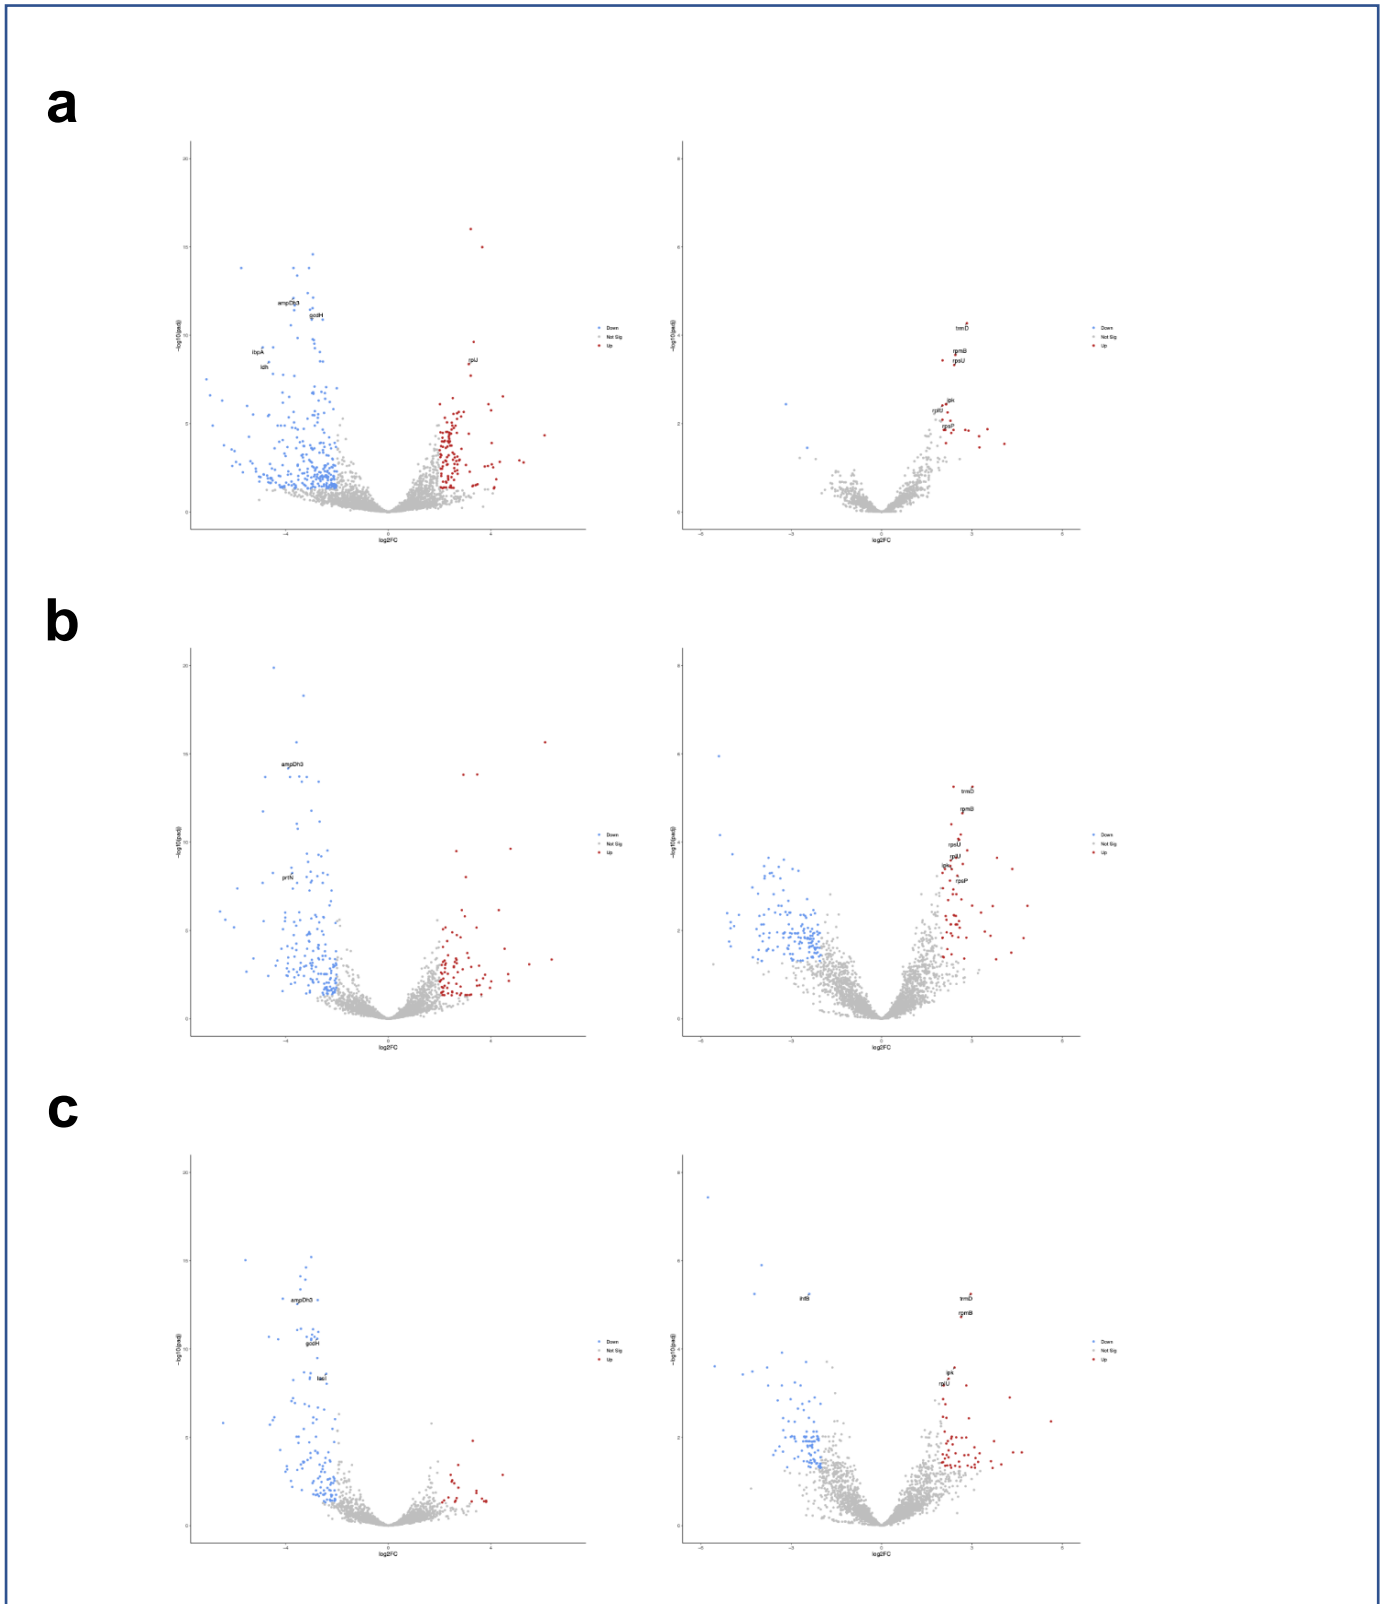

**Supplementary Figure 2. Transcriptomic assessment of mode of action:** Volcano plots showing significant genes for each individual peptide treatment **[a]** Lynronne 1 **[b]** Lynronne 2 **[c]** P15s for PAO1 (left) and LES431 (right). ( $\log_2\text{FoldChanges} \geq 2$  and  $\text{padj} < 0.05$  significance threshold).

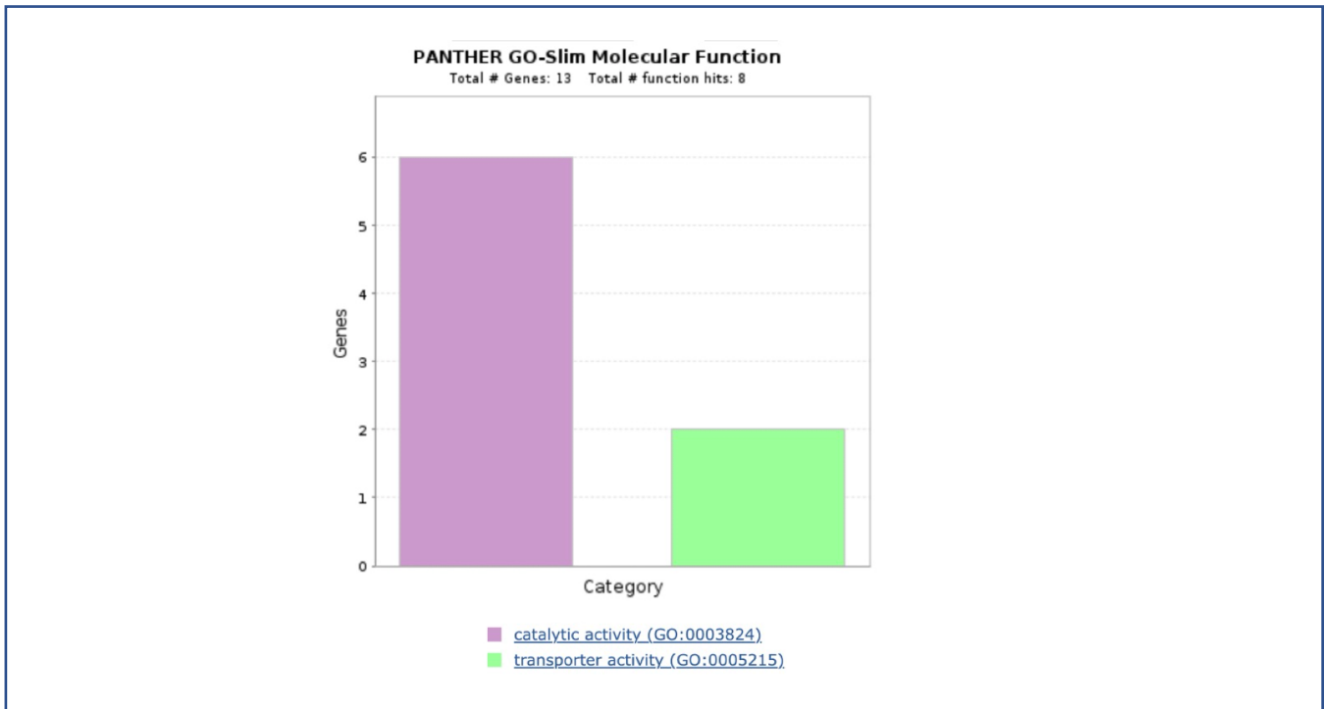

**Supplementary Figure 3. Transcriptomic assessment of mode of action: PAO1, GO** Enrichment Analysis of the top 20 variable DEGs showing molecular function of mapped genes.



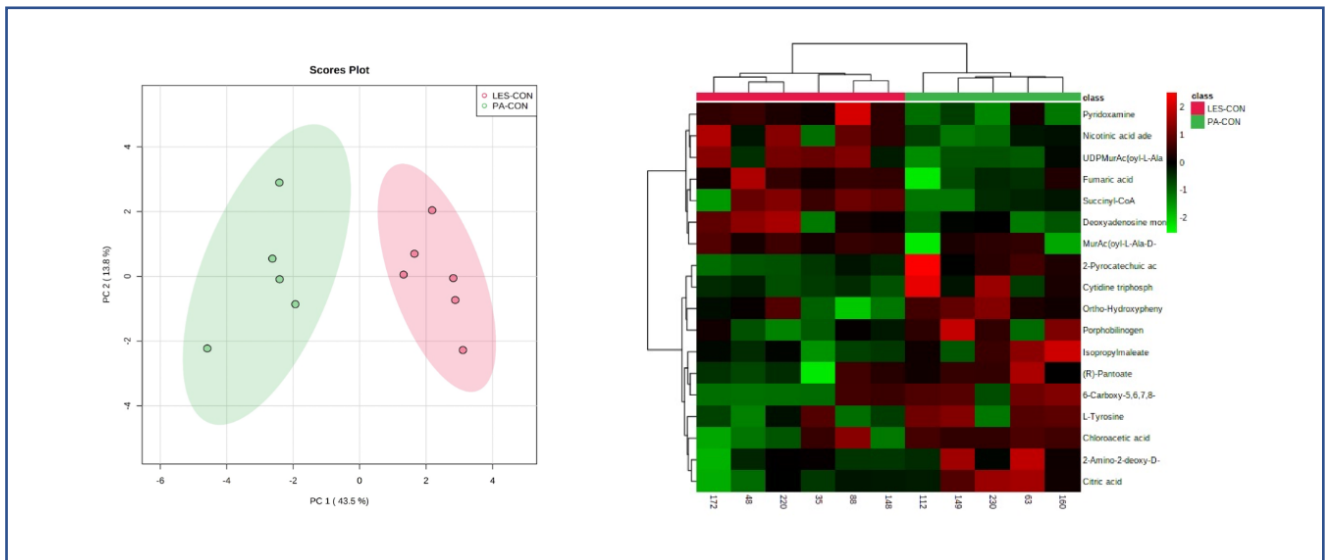

**Supplementary Figure 4. Combined Metabolite Accumulation:** Metabolite data for PAO1 and LES431 combined and shown in a PCA and top 18 HCA heatmap.

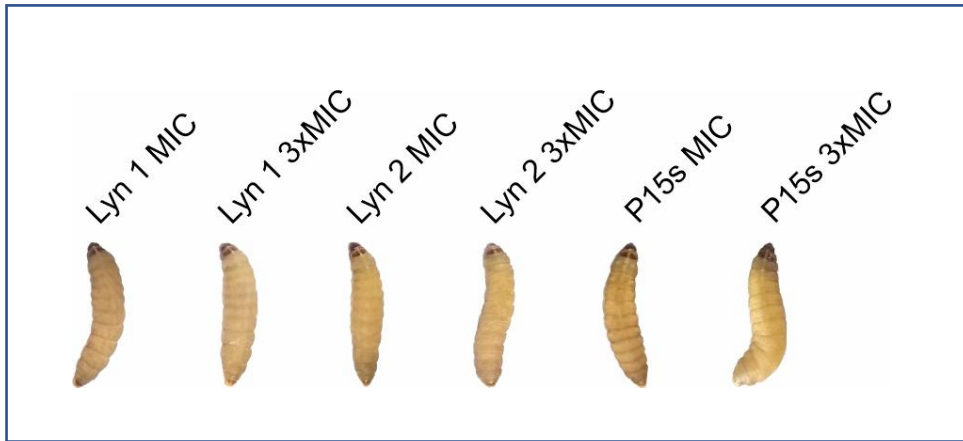

**Supplementary Figure 5 - Assessment of peptide cytotoxicity in *G. mellonella*:** Larvae were inoculated with MIC and 3xMIC doses of the peptides and did not show any death or melanisation after 96 hours.

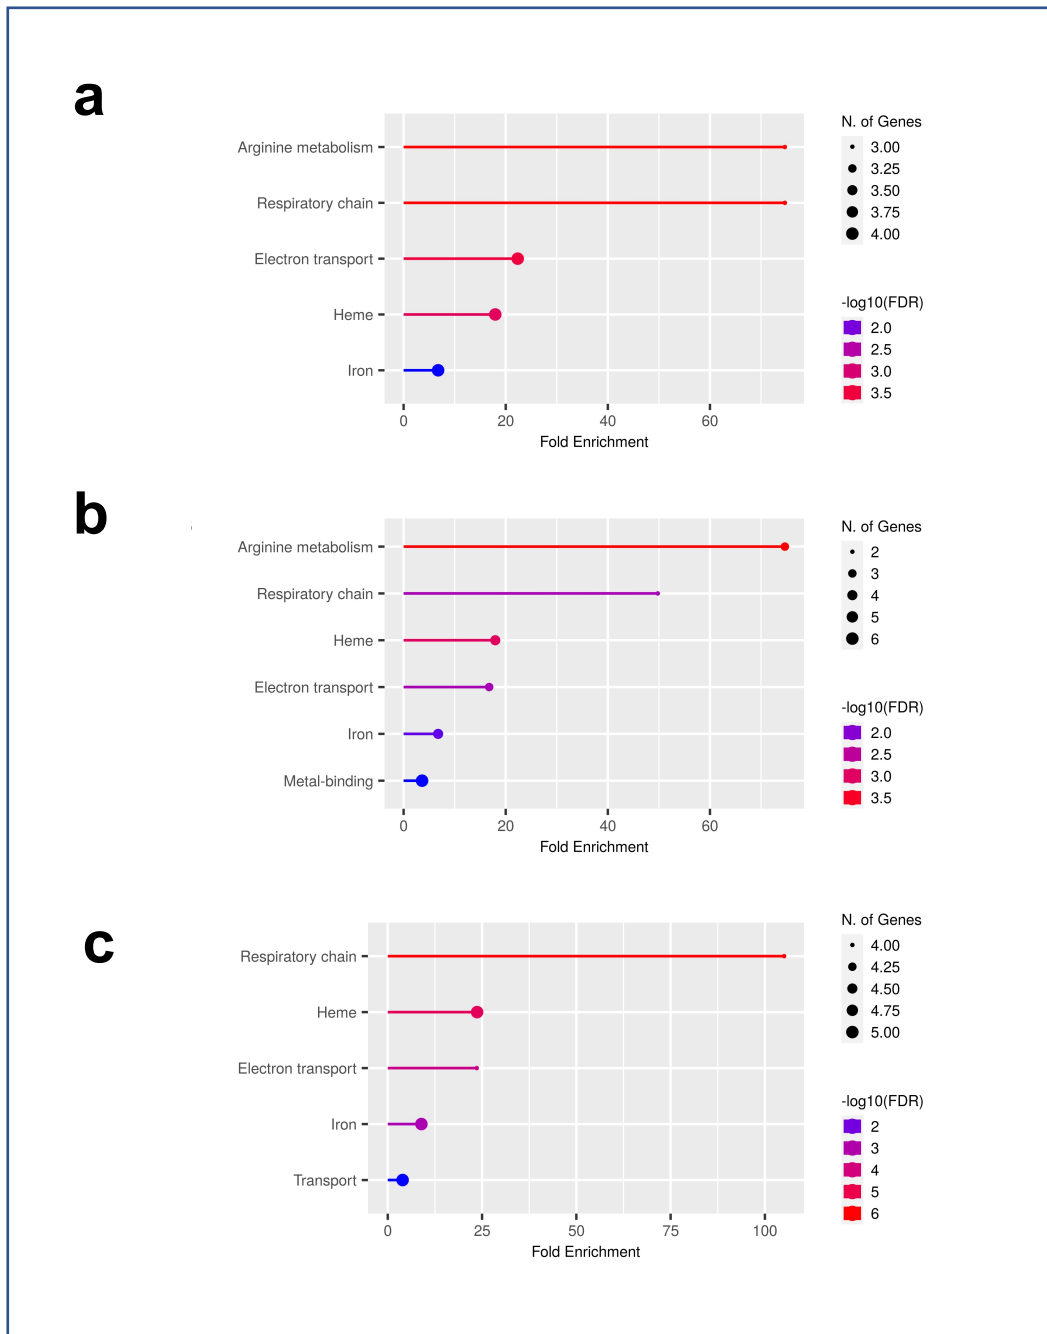

**Supplementary Figure 6 – GO Enrichment Analysis:** Top 40 variable DEGs genes for PAO1 in response to treatment with [a] Lynronne-1 [b] Lynronne-2 [c] P15s. Figures made using ShinyGO 0.76.

**a**

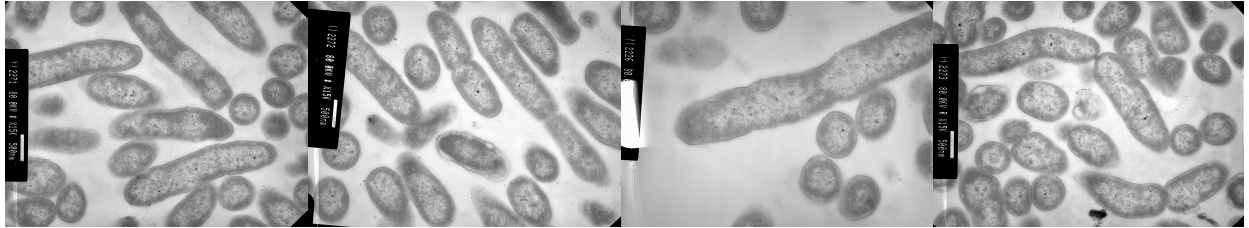

**b**

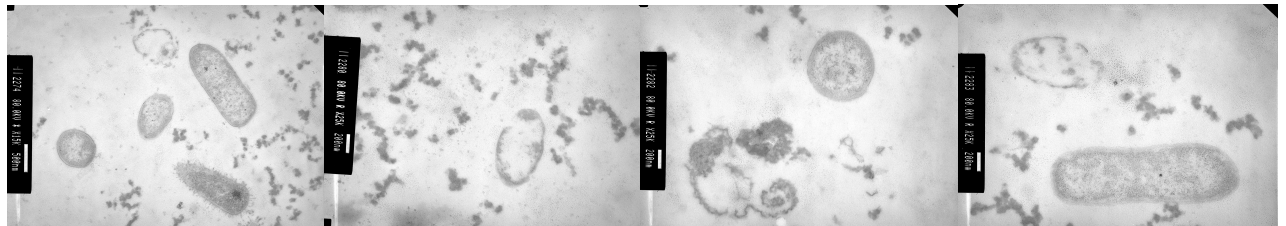

**c**

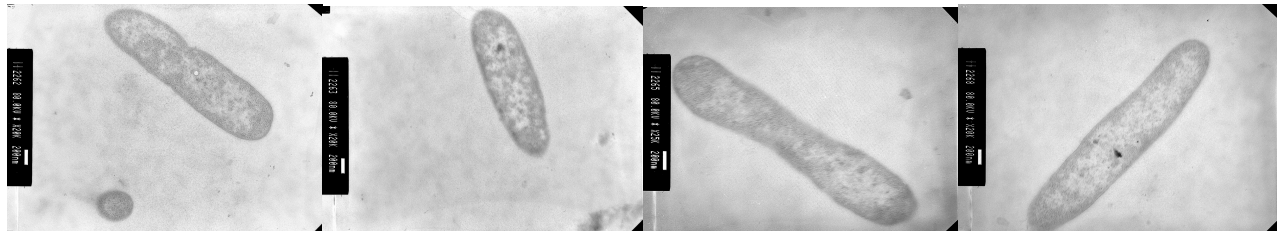

**Supplementary Figure 7 - Transmission electron micrographs of PAO1 cells:** Additional fields of view for **[a]** untreated PAO1 cells. **[b]** Lynronne 1-treated (3xMIC for 1 h) PAO1 cells. **[c]** P15s-treated (3xMIC for 1 h) PAO1 cells. Scale bars are shown on micrographs.

**Supplementary Table 1.** Assessment of potential AMP resistance - Raw daily MIC values

for *P. aeruginosa* strains [a] PAO1 and [b] LES431 in the presence of sub-MIC

concentrations of Lynronne 1, 2 and P15s over a 25-day period. All values are shown in

$\mu\text{g/mL}$ .

**a**

|     | Antimicrobial |    |     |            |     |     |      |     |     |              |     |     |
|-----|---------------|----|-----|------------|-----|-----|------|-----|-----|--------------|-----|-----|
| Day | Lynronne-1    |    |     | Lynronne-2 |     |     | P15s |     |     | Levofloxacin |     |     |
| 1   | 8             | 8  | 16  | 8          | 16  | 16  | 128  | 128 | 128 | 5            | 5   | 5   |
| 2   | 8             | 16 | 16  | 8          | 16  | 16  | 128  | 128 | 128 | 5            | 5   | 5   |
| 3   | 8             | 16 | 8   | 128        | 32  | 16  | 256  | 128 | 256 | 5            | 5   | 5   |
| 4   | 16            | 8  | 8   | 16         | 16  | 16  | 256  | 256 | 256 | 10           | 5   | 5   |
| 5   | 16            | 8  | 32  | 16         | 16  | 16  | 256  | 256 | 256 | 10           | 10  | 10  |
| 6   | 8             | 8  | 128 | 8          | 16  | 64  | 128  | 128 | 512 | 10           | 10  | 10  |
| 7   | 16            | 8  | 16  | 128        | 16  | 64  | 256  | 128 | 256 | 2.5          | 2.5 | 2.5 |
| 8   | 8             | 16 | 16  | 32         | 16  | 32  | 256  | 256 | 256 | 2.5          | 2.5 | 2.5 |
| 9   | 16            | 16 | 16  | 32         | 32  | 32  | 256  | 256 | 256 | 5            | 2.5 | 2.5 |
| 10  | 32            | 16 | 32  | 32         | 32  | 32  | 128  | 128 | 128 | 2.5          | 2.5 | 2.5 |
| 11  | 32            | 16 | 32  | 32         | 32  | 32  | 128  | 128 | 128 | 2.5          | 2.5 | 2.5 |
| 12  | 32            | 16 | 16  | 32         | 16  | 16  | 128  | 128 | 64  | 2.5          | 2.5 | 2.5 |
| 13  | 16            | 16 | 16  | 32         | 32  | 32  | 128  | 64  | 128 | 2.5          | 2.5 | 2.5 |
| 14  | 16            | 8  | 16  | 32         | 32  | 32  | 256  | 64  | 64  | 5            | 2.5 | 2.5 |
| 15  | 16            | 16 | 16  | 32         | 32  | 32  | 256  | 128 | 128 | 2.5          | 2.5 | 2.5 |
| 16  | 16            | 16 | 16  | 32         | 32  | 32  | 256  | 256 | 256 | 2.5          | 5   | 2.5 |
| 17  | 16            | 8  | 8   | 32         | 32  | 32  | 256  | 256 | 256 | 5            | 2.5 | 5   |
| 18  | 8             | 8  | 16  | 32         | 32  | 32  | 128  | 128 | 128 | 2.5          | 5   | 5   |
| 19  | 16            | 8  | 8   | 32         | 32  | 32  | 256  | 256 | 256 | 5            | 2.5 | 5   |
| 20  | 16            | 16 | 16  | 32         | 64  | 32  | 256  | 128 | 128 | 2.5          | 2.5 | 2.5 |
| 21  | 16            | 32 | 32  | 64         | 128 | 128 | 256  | 256 | 256 | 2.5          | 2.5 | 2.5 |
| 22  | 16            | 32 | 32  | 32         | 64  | 128 | 256  | 256 | 128 | 2.5          | 2.5 | 2.5 |
| 23  | 32            | 64 | 64  | 128        | 128 | 256 | 256  | 256 | 256 | 2.5          | 5   | 5   |
| 24  | 16            | 64 | 64  | 128        | 128 | 128 | 128  | 128 | 128 | 5            | 2.5 | 2.5 |
| 25  | 8             | 32 | 16  | 64         | 128 | 128 | 128  | 128 | 128 | 10           | 10  | 10  |

**b**

|            | <b>Antimicrobial</b> |    |    |                   |    |     |             |     |     |                     |      |      |
|------------|----------------------|----|----|-------------------|----|-----|-------------|-----|-----|---------------------|------|------|
| <b>Day</b> | <b>Lynronne-1</b>    |    |    | <b>Lynronne-2</b> |    |     | <b>P15s</b> |     |     | <b>Levofloxacin</b> |      |      |
| <b>1</b>   | 32                   | 32 | 32 | 64                | 64 | 32  | 256         | 256 | 256 | 1.25                | 1.25 | 1.25 |
| <b>2</b>   | 32                   | 32 | 32 | 64                | 32 | 32  | 256         | 128 | 128 | 5                   | 1.25 | 1.25 |
| <b>3</b>   | 64                   | 16 | 32 | 64                | 64 | 32  | 256         | 256 | 128 | 5                   | 5    | 5    |
| <b>4</b>   | 32                   | 32 | 32 | 32                | 32 | 32  | 256         | 256 | 256 | 5                   | 5    | 5    |
| <b>5</b>   | 64                   | 32 | 32 | 32                | 64 | 32  | 256         | 256 | 256 | 5                   | 5    | 5    |
| <b>6</b>   | 32                   | 32 | 32 | 32                | 32 | 32  | 256         | 128 | 256 | 10                  | 2.5  | 5    |
| <b>7</b>   | 32                   | 32 | 16 | 16                | 32 | 16  | 256         | 128 | 256 | 1.25                | 1.25 | 1.25 |
| <b>8</b>   | 32                   | 32 | 16 | 32                | 64 | 16  | 256         | 256 | 256 | 1.25                | 1.25 | 1.25 |
| <b>9</b>   | 32                   | 64 | 16 | 32                | 64 | 16  | 256         | 256 | 256 | 1.25                | 1.25 | 1.25 |
| <b>10</b>  | 32                   | 64 | 32 | 32                | 64 | 16  | 128         | 128 | 128 | 1.25                | 1.25 | 1.25 |
| <b>11</b>  | 64                   | 64 | 32 | 64                | 64 | 32  | 128         | 128 | 128 | 1.25                | 1.25 | 1.25 |
| <b>12</b>  | 64                   | 64 | 32 | 32                | 64 | 32  | 128         | 128 | 128 | 1.25                | 1.25 | 1.25 |
| <b>13</b>  | 32                   | 64 | 32 | 64                | 32 | 32  | 256         | 256 | 128 | 1.25                | 1.25 | 1.25 |
| <b>14</b>  | 32                   | 32 | 16 | 32                | 32 | 16  | 128         | 128 | 128 | 1.25                | 1.25 | 1.25 |
| <b>15</b>  | 32                   | 32 | 32 | 32                | 32 | 32  | 256         | 256 | 128 | 1.25                | 1.25 | 1.25 |
| <b>16</b>  | 32                   | 16 | 16 | 64                | 64 | 32  | 256         | 128 | 256 | 1.25                | 1.25 | 1.25 |
| <b>17</b>  | 32                   | 32 | 16 | 64                | 64 | 32  | 256         | 256 | 256 | 1.25                | 1.25 | 1.25 |
| <b>18</b>  | 32                   | 32 | 16 | 64                | 64 | 32  | 256         | 128 | 256 | 1.25                | 1.25 | 1.25 |
| <b>19</b>  | 32                   | 16 | 32 | 64                | 64 | 64  | 128         | 128 | 128 | 1.25                | 1.25 | 1.25 |
| <b>20</b>  | 32                   | 64 | 32 | 64                | 64 | 64  | 128         | 128 | 128 | 1.25                | 1.25 | 1.25 |
| <b>21</b>  | 64                   | 32 | 64 | 32                | 32 | 32  | 256         | 256 | 128 | 1.25                | 1.25 | 1.25 |
| <b>22</b>  | 64                   | 64 | 64 | 32                | 32 | 32  | 256         | 128 | 256 | 1.25                | 1.25 | 1.25 |
| <b>23</b>  | 64                   | 32 | 64 | 32                | 32 | 128 | 128         | 128 | 128 | 1.25                | 1.25 | 1.25 |
| <b>24</b>  | 64                   | 64 | 64 | 32                | 32 | 128 | 128         | 128 | 128 | 1.25                | 1.25 | 1.25 |
| <b>25</b>  | 32                   | 32 | 32 | 32                | 32 | 64  | 128         | 128 | 128 | 1.25                | 2.5  | 2.5  |
